# Supplementary figures and images for: Has anything changed? Women’s acceptance of wife beating in Nigeria: Analysis of data from the last two DHS datasets
Source: Research Square preprint supplement (doi:10.21203/rs.3.rs-8674114/v1), 2026-01-29

Sample characteristics


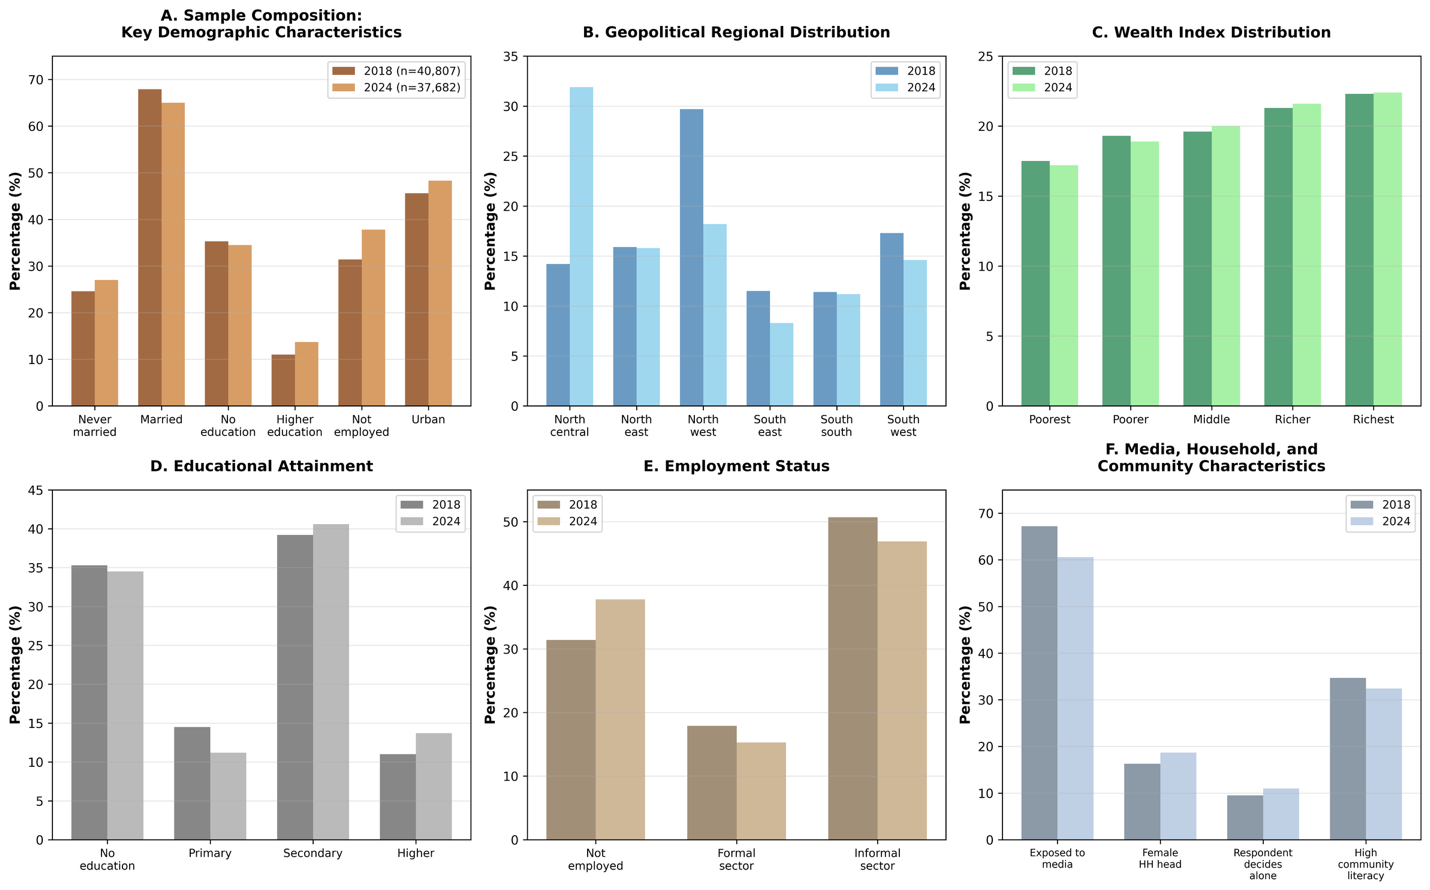


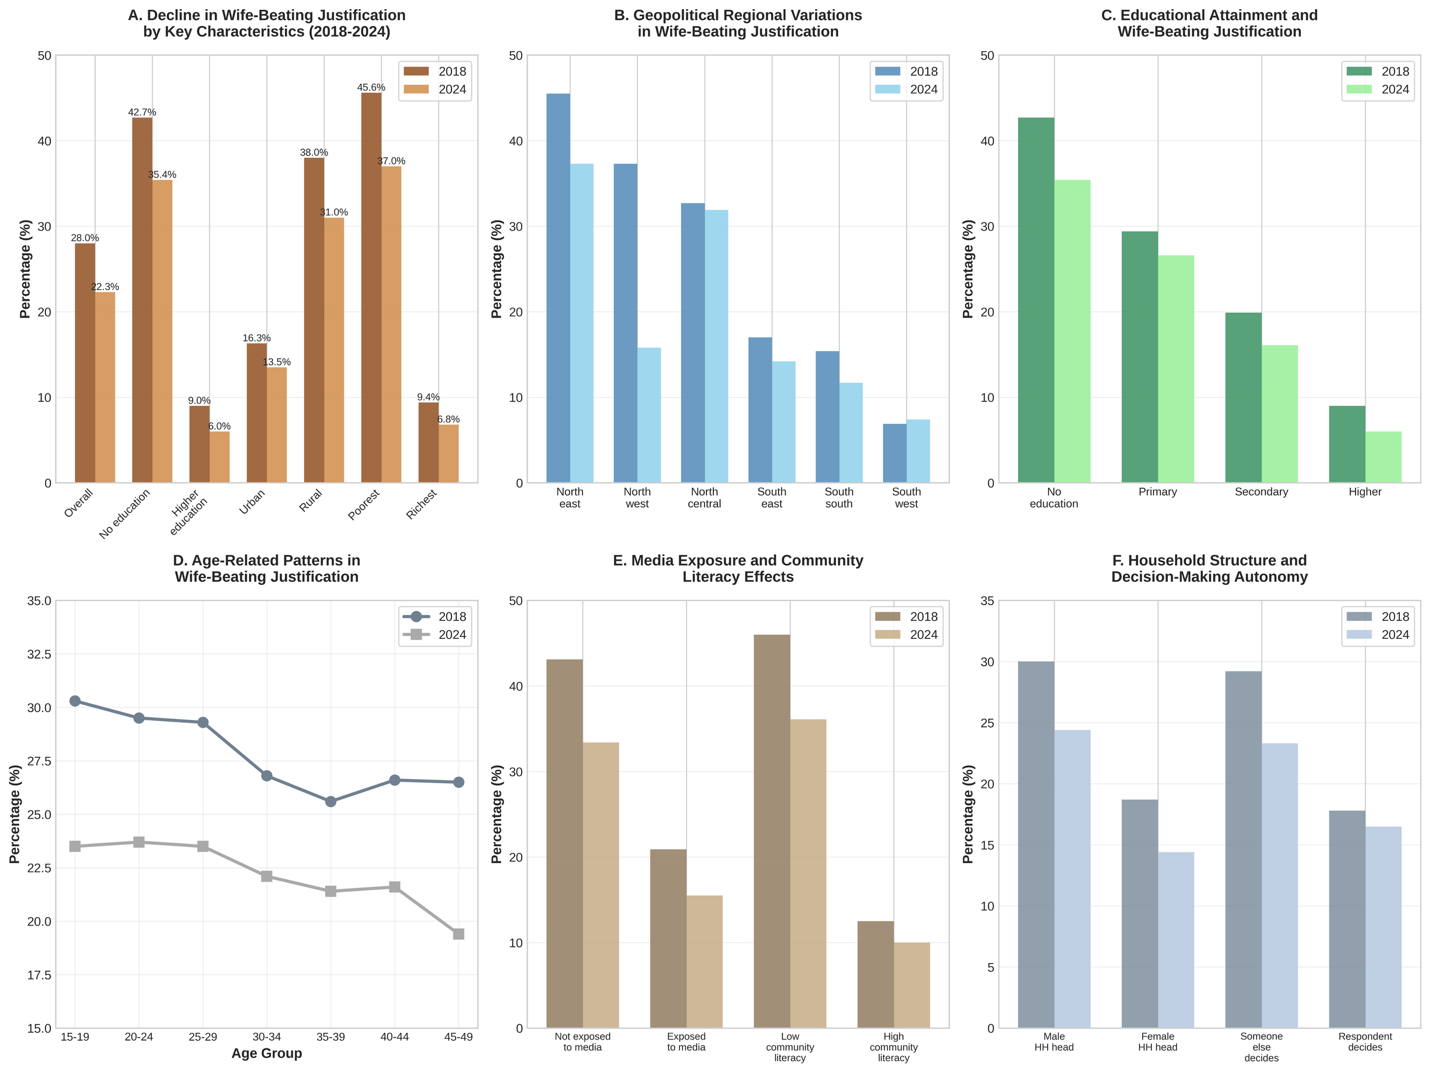

Supplement: Supplementary file 1 [file 7272b068a887c82879c7b380.docx]
